# Supplementary material for: Comparing mTOR inhibitor Rapamycin with Torin-2 within the RIST molecular-targeted regimen in neuroblastoma cells
Source: PubMed Central journal article supplement (PMC7738968; doi:10.7150/ijms.48393), 2021-01-01
Supplement: ijmsv18p0137s1.pdf [file ijmsv18p0137s1.pdf]

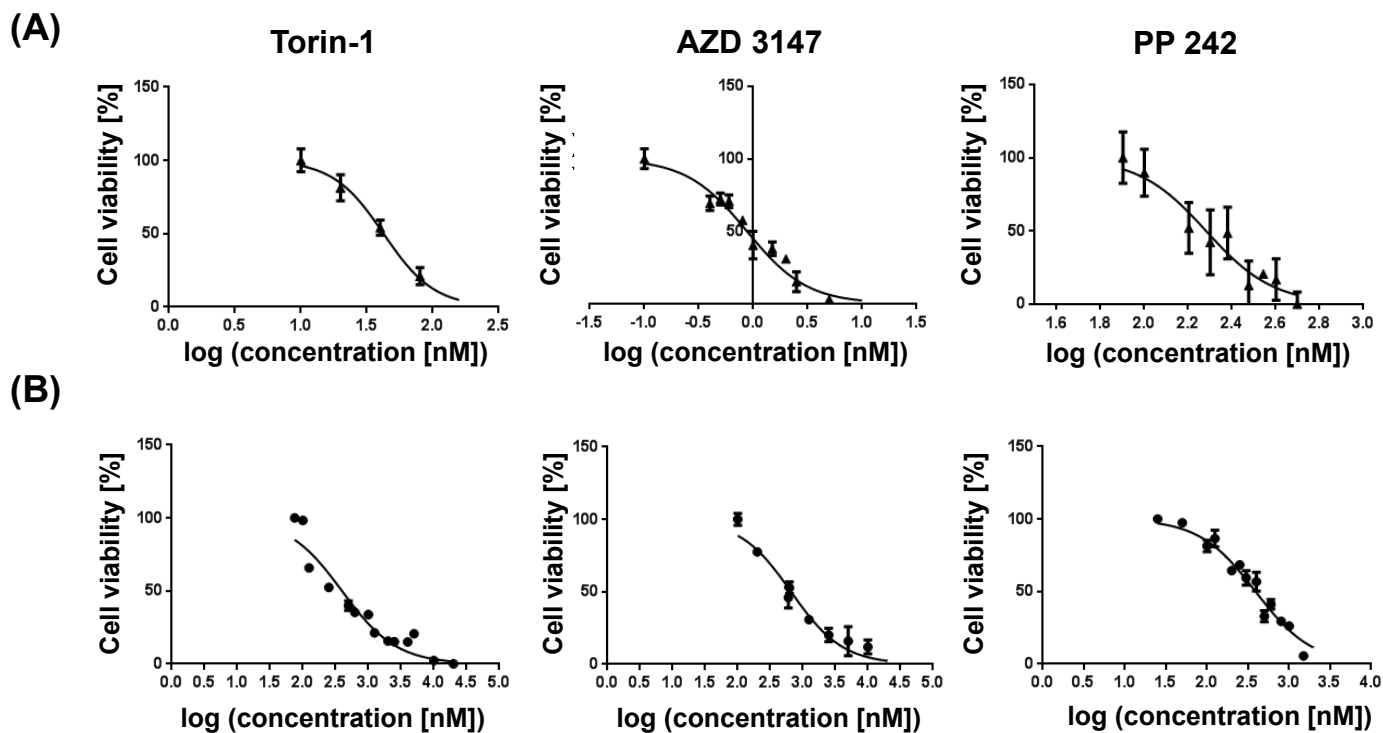

**Fig. S1:** Viability tests to determine the IC<sub>50</sub> value of various mTOR inhibitors in neuroblastoma cell line (A) Kelly and (B) IMR-32 after 72h treatment. The cell viability was tested by applying the MTT test as described under Methods.

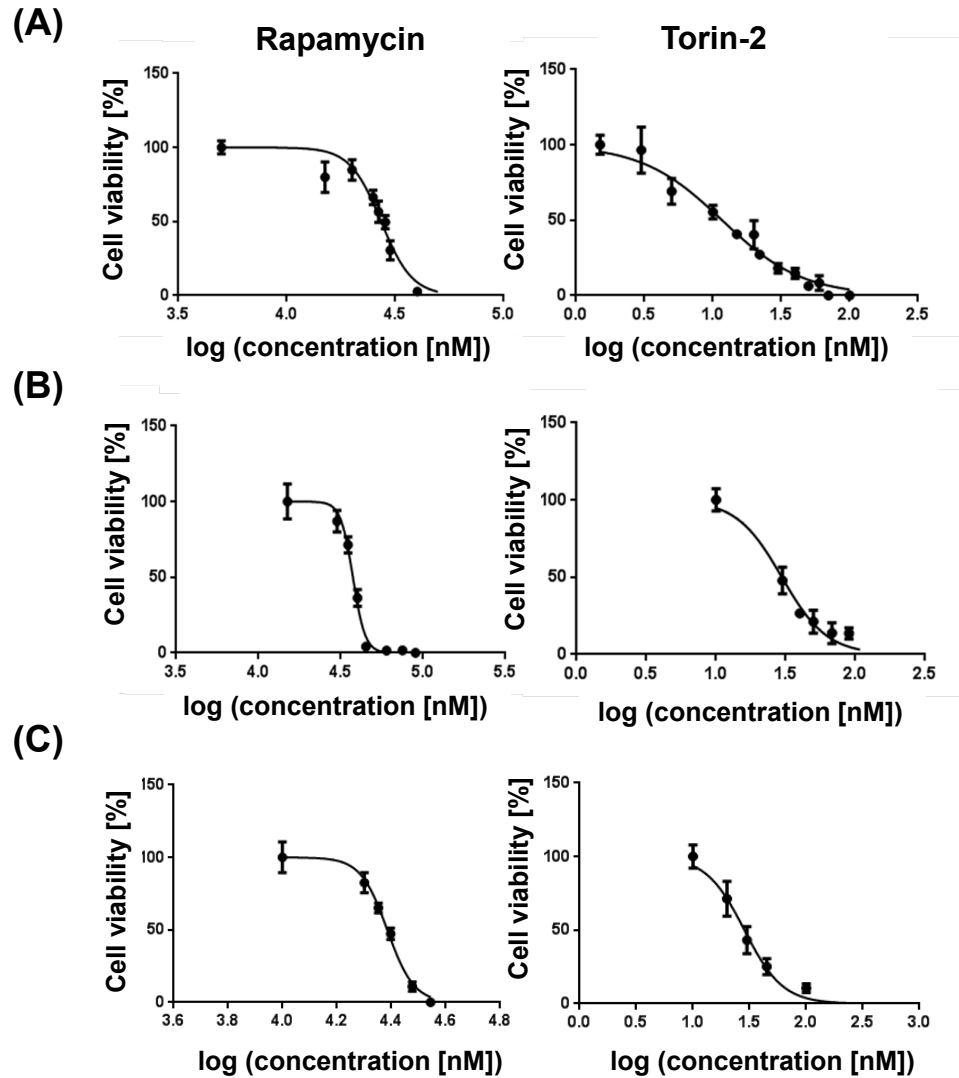

**Fig. S2:** Viability tests to determine IC<sub>50</sub> of Rapamycin and Torin-2 in neuroblastoma cell line (A) Kelly, (B) IMR-32, and (C) SK-N-BE(2) after 72h treatment. The cell viability was tested by applying the MTT test as described under Methods.

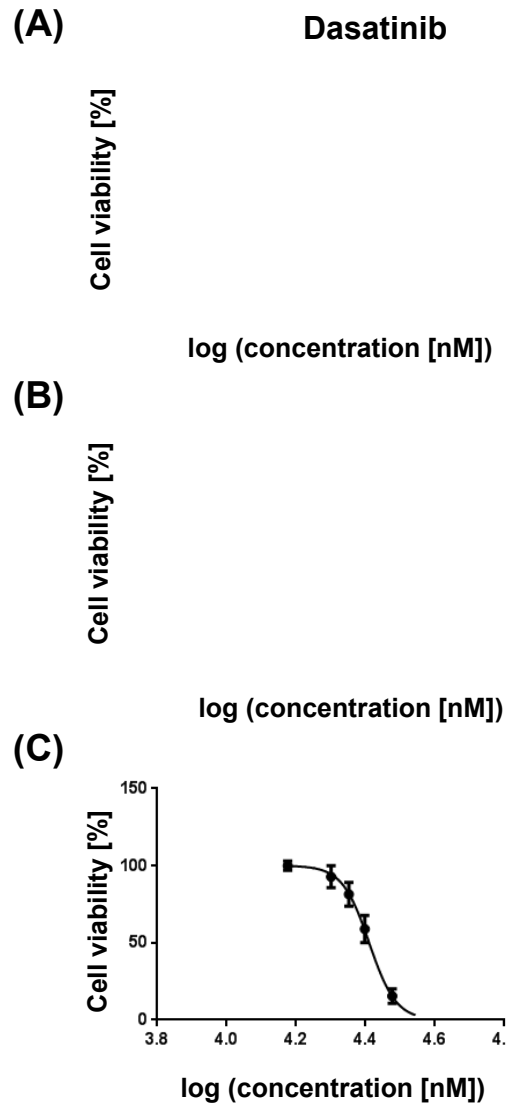

**Fig. S3:** Viability tests to determine  $IC_{50}$  of Dasatinib in neuroblastoma cell line (A) Kelly, (B) IMR-32, and (C) SK-N-BE(2) after 72h treatment. The cell viability was tested by applying the MTT test as described under Methods.

**Table S1:** Viability tests to determine IC<sub>50</sub> of Dasatinib in neuroblastoma (NB) cell line Kelly, IMR-32, and SK-N-BE(2).

| <b>NB cell line</b> | <b>Dasatinib<br/>[<math>\mu</math>M]</b> |
|---------------------|------------------------------------------|
| <b>Kelly</b>        | 9.47 $\pm$ 0.010                         |
| <b>IMR-32</b>       | 1.53 $\pm$ 0.053                         |
| <b>SK-N-BE(2)</b>   | 25.73 $\pm$ 0.003                        |

**Table S2:** Viability tests to determine the dose reduction factor (DRF) of Dasatinib combined with Rapamycin in neuroblastoma (NB) cell line Kelly, IMR-32, and SK-N-BE(2).

| mTOR-inhibitor/<br>NB cell line | Dasatinib<br>[ $\mu\text{M}$ ] | Rapamycin<br>[ $\mu\text{M}$ ] | Dasatinib<br>[DRF] | Rapamycin<br>[DRF] |
|---------------------------------|--------------------------------|--------------------------------|--------------------|--------------------|
| Kelly                           | 5.00                           | 2.00                           | 1.9                | 13.6               |
| IMR-32                          | 0.05                           | 0.13                           | 30.6               | 288.2              |
| SK-N-BE(2)                      | 20.00                          | 5.00                           | 1.3                | 4.9                |

**Table S3:** Viability tests to determine the dose reduction factor (DRF) of Dasatinib combined with Torin-2 in neuroblastoma (NB) cell line Kelly, IMR-32, and SK-N-BE(2).

| mTOR-inhibitor/<br>NB cell line | Dasatinib<br>[ $\mu\text{M}$ ] | Torin-2<br>[nM] | Dasatinib<br>[DRF] | Torin-2<br>[DRF] |
|---------------------------------|--------------------------------|-----------------|--------------------|------------------|
| Kelly                           | 1.50                           | 9.00            | 6.3                | 1.3              |
| IMR-32                          | 1.00                           | 6.00            | 1.5                | 4.9              |
| SK-N-BE(2)                      | 12.50                          | 15.00           | 2.1                | 1.9              |

**Table S4:** Viability test to determine half maximal inhibitory concentration (IC<sub>50</sub>) of molecular-targeted inhibitors Rapamycin, Torin-2, and Dasatinib as well as chemotherapeutics Irinotecan (SN-38) and Temozolomide (TMZ) in neuroblastoma (NB) cell line Kelly and IMR-32.

| Inhibitor/<br>NB cell line | Rapamycin<br>[ $\mu$ M] | Dasatinib<br>[ $\mu$ M] | Torin-2<br>[nM]   | SN-38<br>[nM]    | TMZ<br>[ $\mu$ M]  |
|----------------------------|-------------------------|-------------------------|-------------------|------------------|--------------------|
| Kelly                      | 27.21 $\pm$ 0.006       | 9.47 $\pm$ 0.010        | 11.69 $\pm$ 0.019 | 2.74 $\pm$ 0.008 | 246.00 $\pm$ 0.004 |
| IMR-32                     | 37.47 $\pm$ 0.003       | 1.53 $\pm$ 0.057        | 29.67 $\pm$ 0.013 | 0.67 $\pm$ 0.009 | 159.90 $\pm$ 0.004 |

**Table S5:** Viability tests to determine the dose reduction factor (DRF) of Irinotecan (SN-38) combined with Temozolomide (TMZ) in neuroblastoma (NB) cell line Kelly and IMR-32.

| mTor-inhibitor/<br>NB cell line | SN-38<br>[nM] | TMZ<br>[ $\mu$ M] | SN-38<br>[DRF] | TMZ<br>[DRF] |
|---------------------------------|---------------|-------------------|----------------|--------------|
| Kelly                           | 1.00          | 225.00            | 2.7            | 1.1          |
| IMR-32                          | 0.40          | 120.00            | 0.2            | 1.3          |

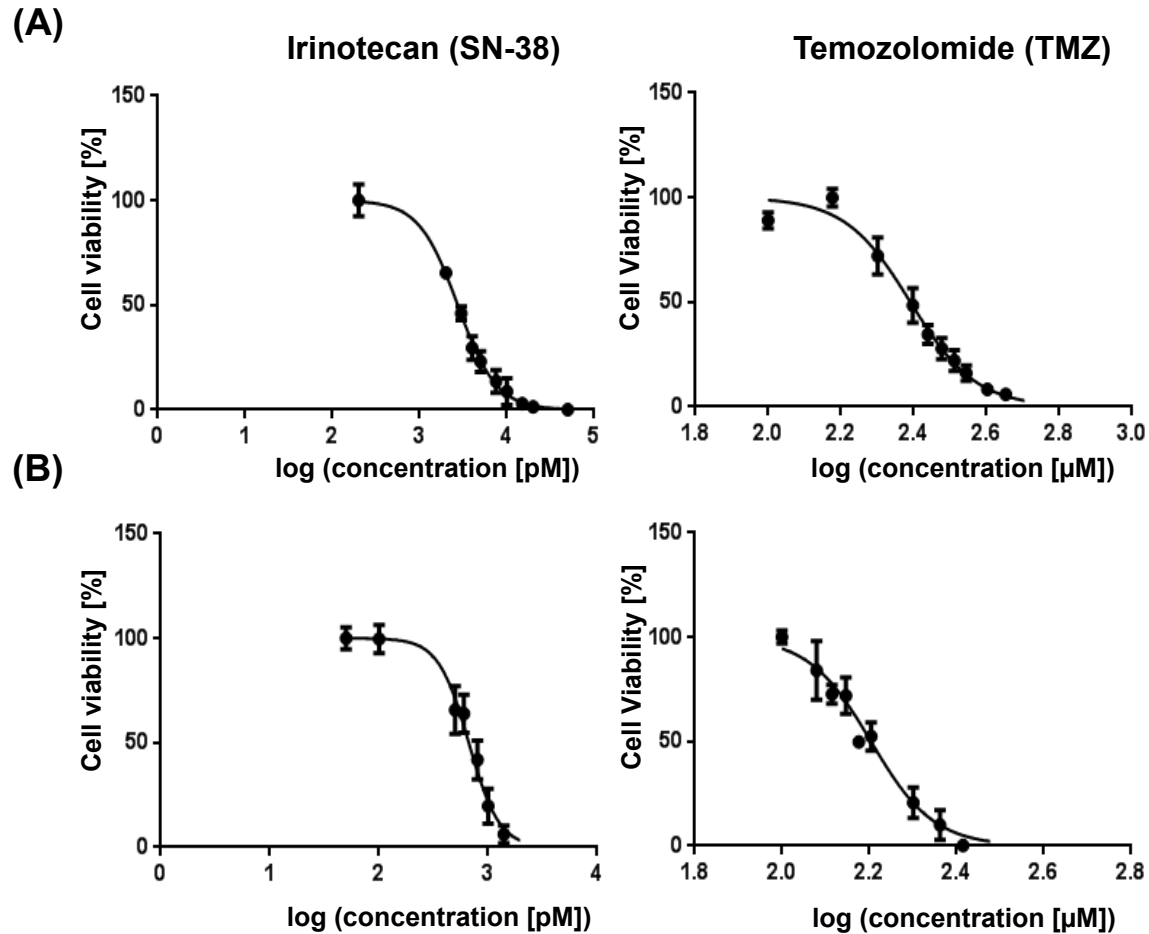

**Fig. S4:** Viability tests to determine  $IC_{50}$  of Irinotecan (SN-38) and Temozolomide (TMZ) in neuroblastoma cell line (A) Kelly and (B) IMR-32 after 72h treatment. The cell viability was tested by applying the MTT test as described under Methods.

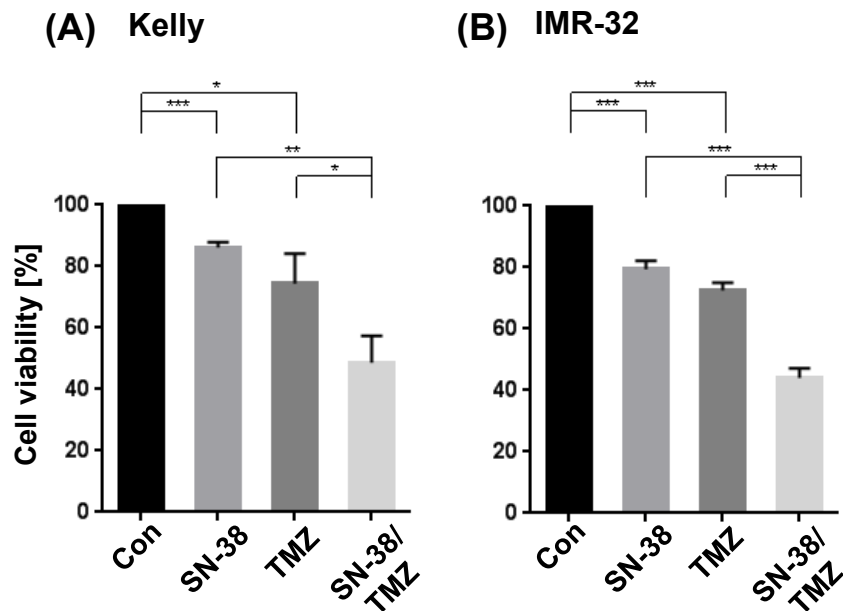

**(C)**

| Inhibitor/<br>NB cell line | SN-38 + TMZ<br>[CI] |
|----------------------------|---------------------|
| Kelly                      | 1.20 ± 0.09         |
| IMR-32                     | 1.30 ± 0.15         |

**Note:** CI < 0.9 = synergistic; 0.9-1.1 = additive; > 1.1 = antagonistic

**Fig. S5:** Viability tests to determine  $IC_{50}$  of chemotherapeutics Irinotecan (SN-38), Temozolomide (TMZ), and drug combination (SN-38/TMZ) in neuroblastoma (NB) cell line (A) Kelly and (B) IMR-32. Con: DMSO-treated control cells. (C) Viability tests to determine the combinatorial index (CI). The cell viability was tested by applying the MTT test as described under Methods.
